# Supplementary material for: ABCB1 protects bat cells from DNA damage induced by genotoxic compounds
Source: PubMed Central journal article supplement (PMC6597548; doi:10.1038/s41467-019-10495-4), 2019-06-27
Supplement: 41467_2019_10495_MOESM1_ESM.pdf [file 41467_2019_10495_MOESM1_ESM.pdf]

**ABCB1 protects bat cells from DNA damage induced by genotoxic compounds**

**Koh et al.**



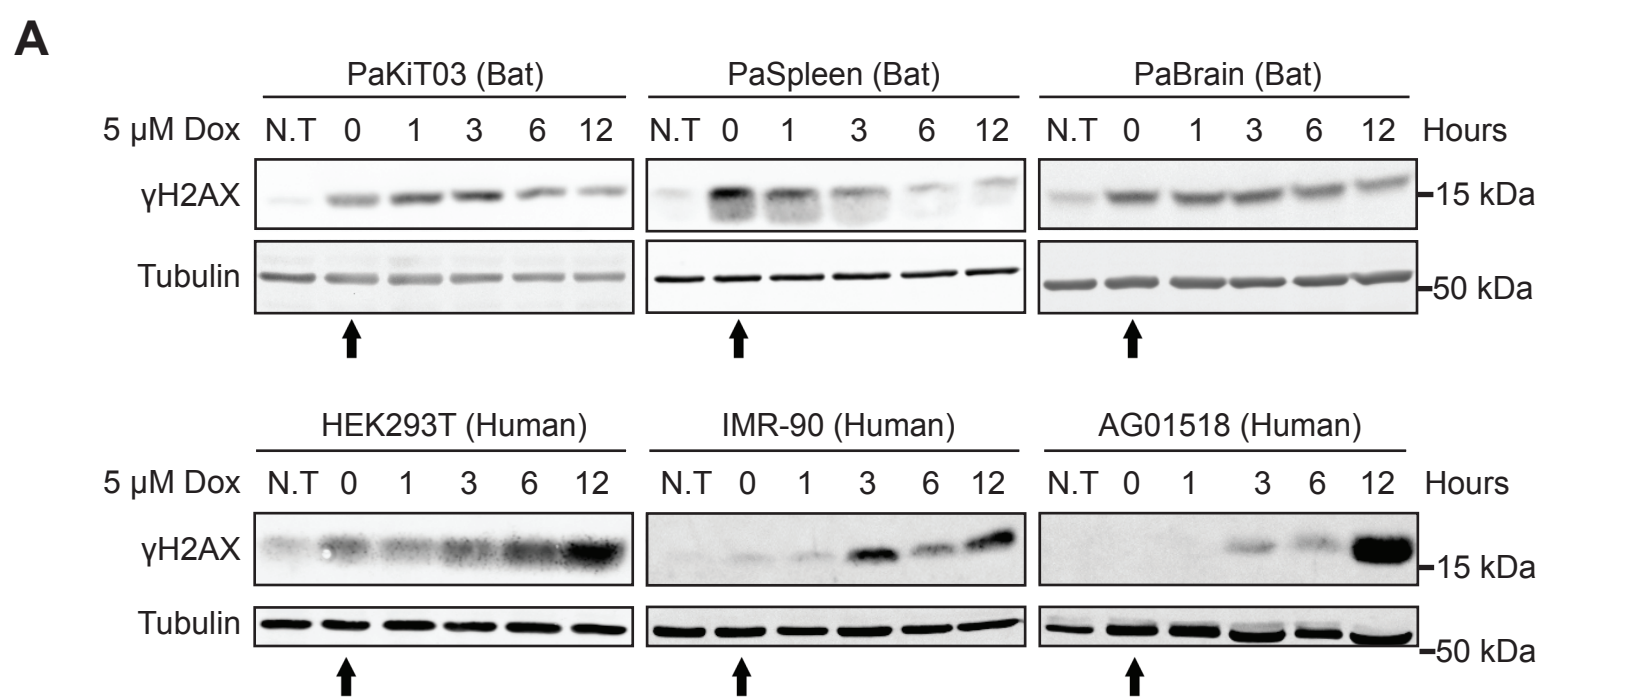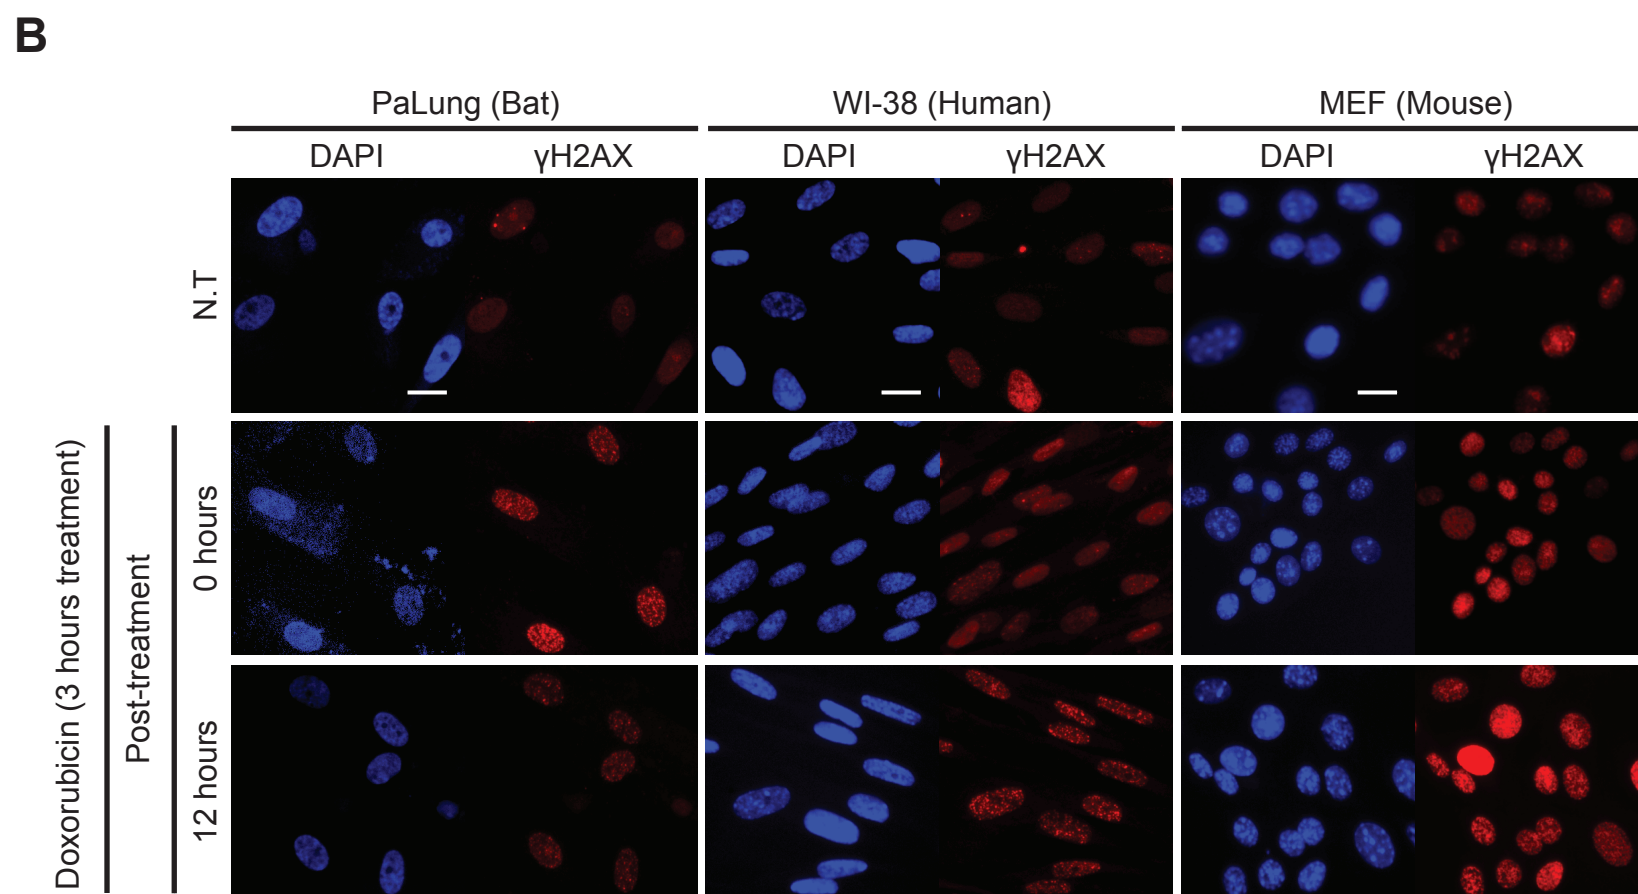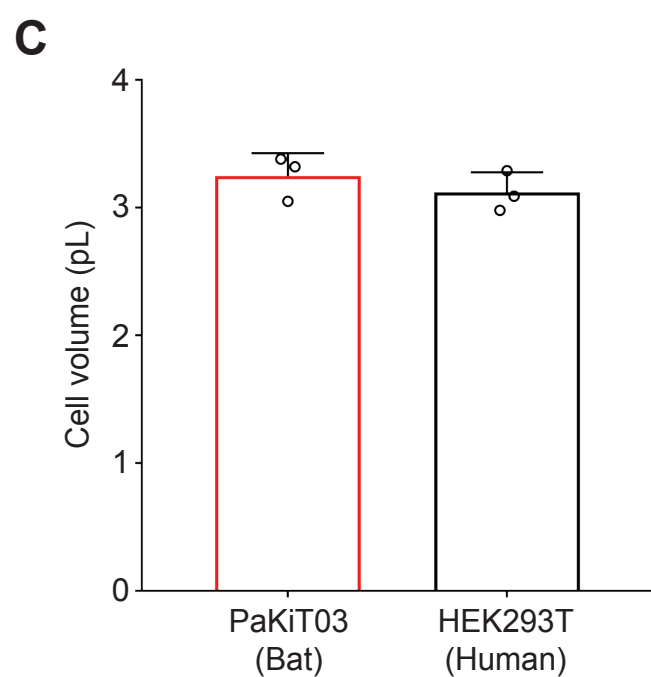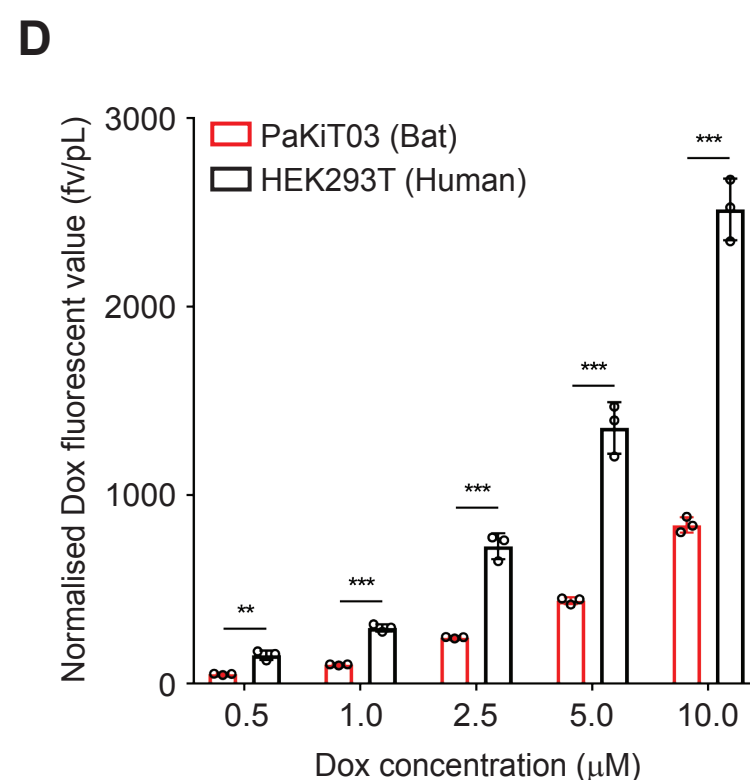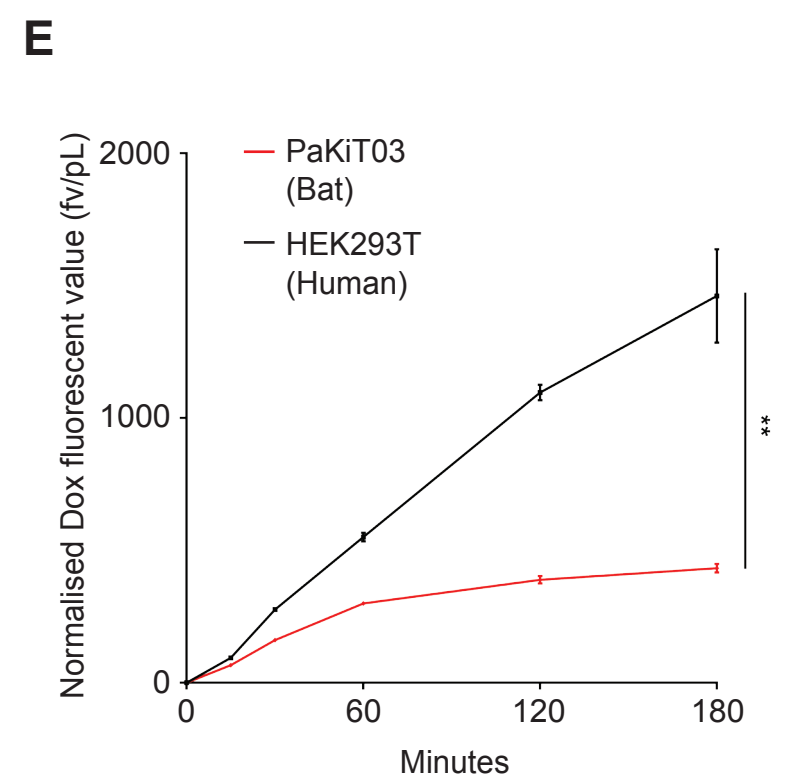

**Supplementary Figure 2. Western blot analysis of  $\gamma$ H2AX and intracellular accumulation of doxorubicin in *Pteropus alecto* and human cell lines**

(A) Western blot analysis of  $\gamma$ H2AX. The indicated cells were treated with 5  $\mu$ M doxorubicin (Dox) for 3 hours, followed by drug-free medium up to 12 hours (starting at t=0 hours, indicated by arrow). Protein lysates were harvested at the indicated time points. Tubulin was used as a loading control. N.T stands for no treatment. Blots are representative of three independent experiments.

(B) Immunofluorescence staining of  $\gamma$ H2AX for PaLung, WI-38 and MEF cells. Cells were treated with 5  $\mu$ M doxorubicin for 3 hours, and fixed immediately (0 hour) or at 12 hours after culturing in a doxorubicin-free medium. N.T stands for no treatment. Scale bars represent 20  $\mu$ m. Results are representative of three independent experiments.

(C) The volume of PaKiT03 and HEK293T cells. Bars represent mean volume  $\pm$  SD of three experiments.

(D) Doxorubicin accumulation in PaKiT03 and HEK293T cells after 3 hours of incubation at the indicated concentration. The amount of accumulated doxorubicin in cells was analysed by flow cytometry. The mean fluorescence value (fv) of doxorubicin is normalised to cell volume (pL). Results were generated from three experimental repeats. Statistical significance of  $p < 0.01$  was represented with \*\* and  $p < 0.001$  with \*\*\*.

(E) Time course of doxorubicin accumulation in PaKiT03 and HEK293T cells. Cells were treated with 5  $\mu$ M doxorubicin for the indicated time, and analysed by flow cytometry. The mean fluorescence value of doxorubicin accumulated in each cell line is normalised to cell size. Results were generated from three experimental repeats. Statistical significance of  $p < 0.01$  was represented with \*\*.



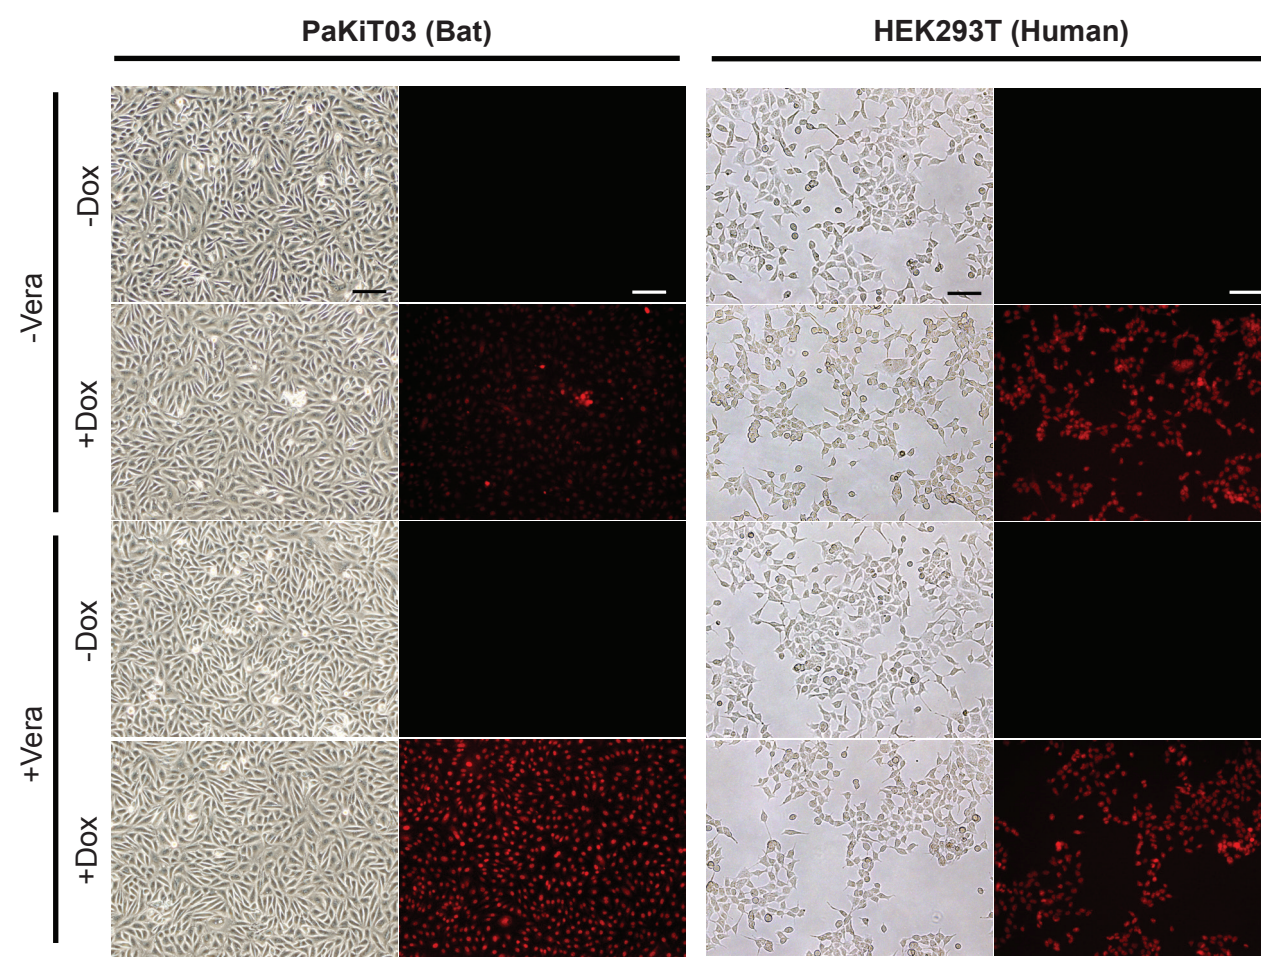

**Supplementary Figure 3. Analysis of drug efflux capability via ABC transporters in PaKiT03 and HEK293T cells**

Doxorubicin (Dox) fluorescence or phase contrast images of PaKiT03 and HEK293T cells. Cells were pre-treated without or with 5  $\mu$ M verapamil (Vera) for 30 minutes before the treatment with 10  $\mu$ M doxorubicin alone or together with verapamil for an additional 3 hours. Images were acquired with 10x objective lens and scale bar represents 100  $\mu$ m. All results were representative of at least three experimental repeats.



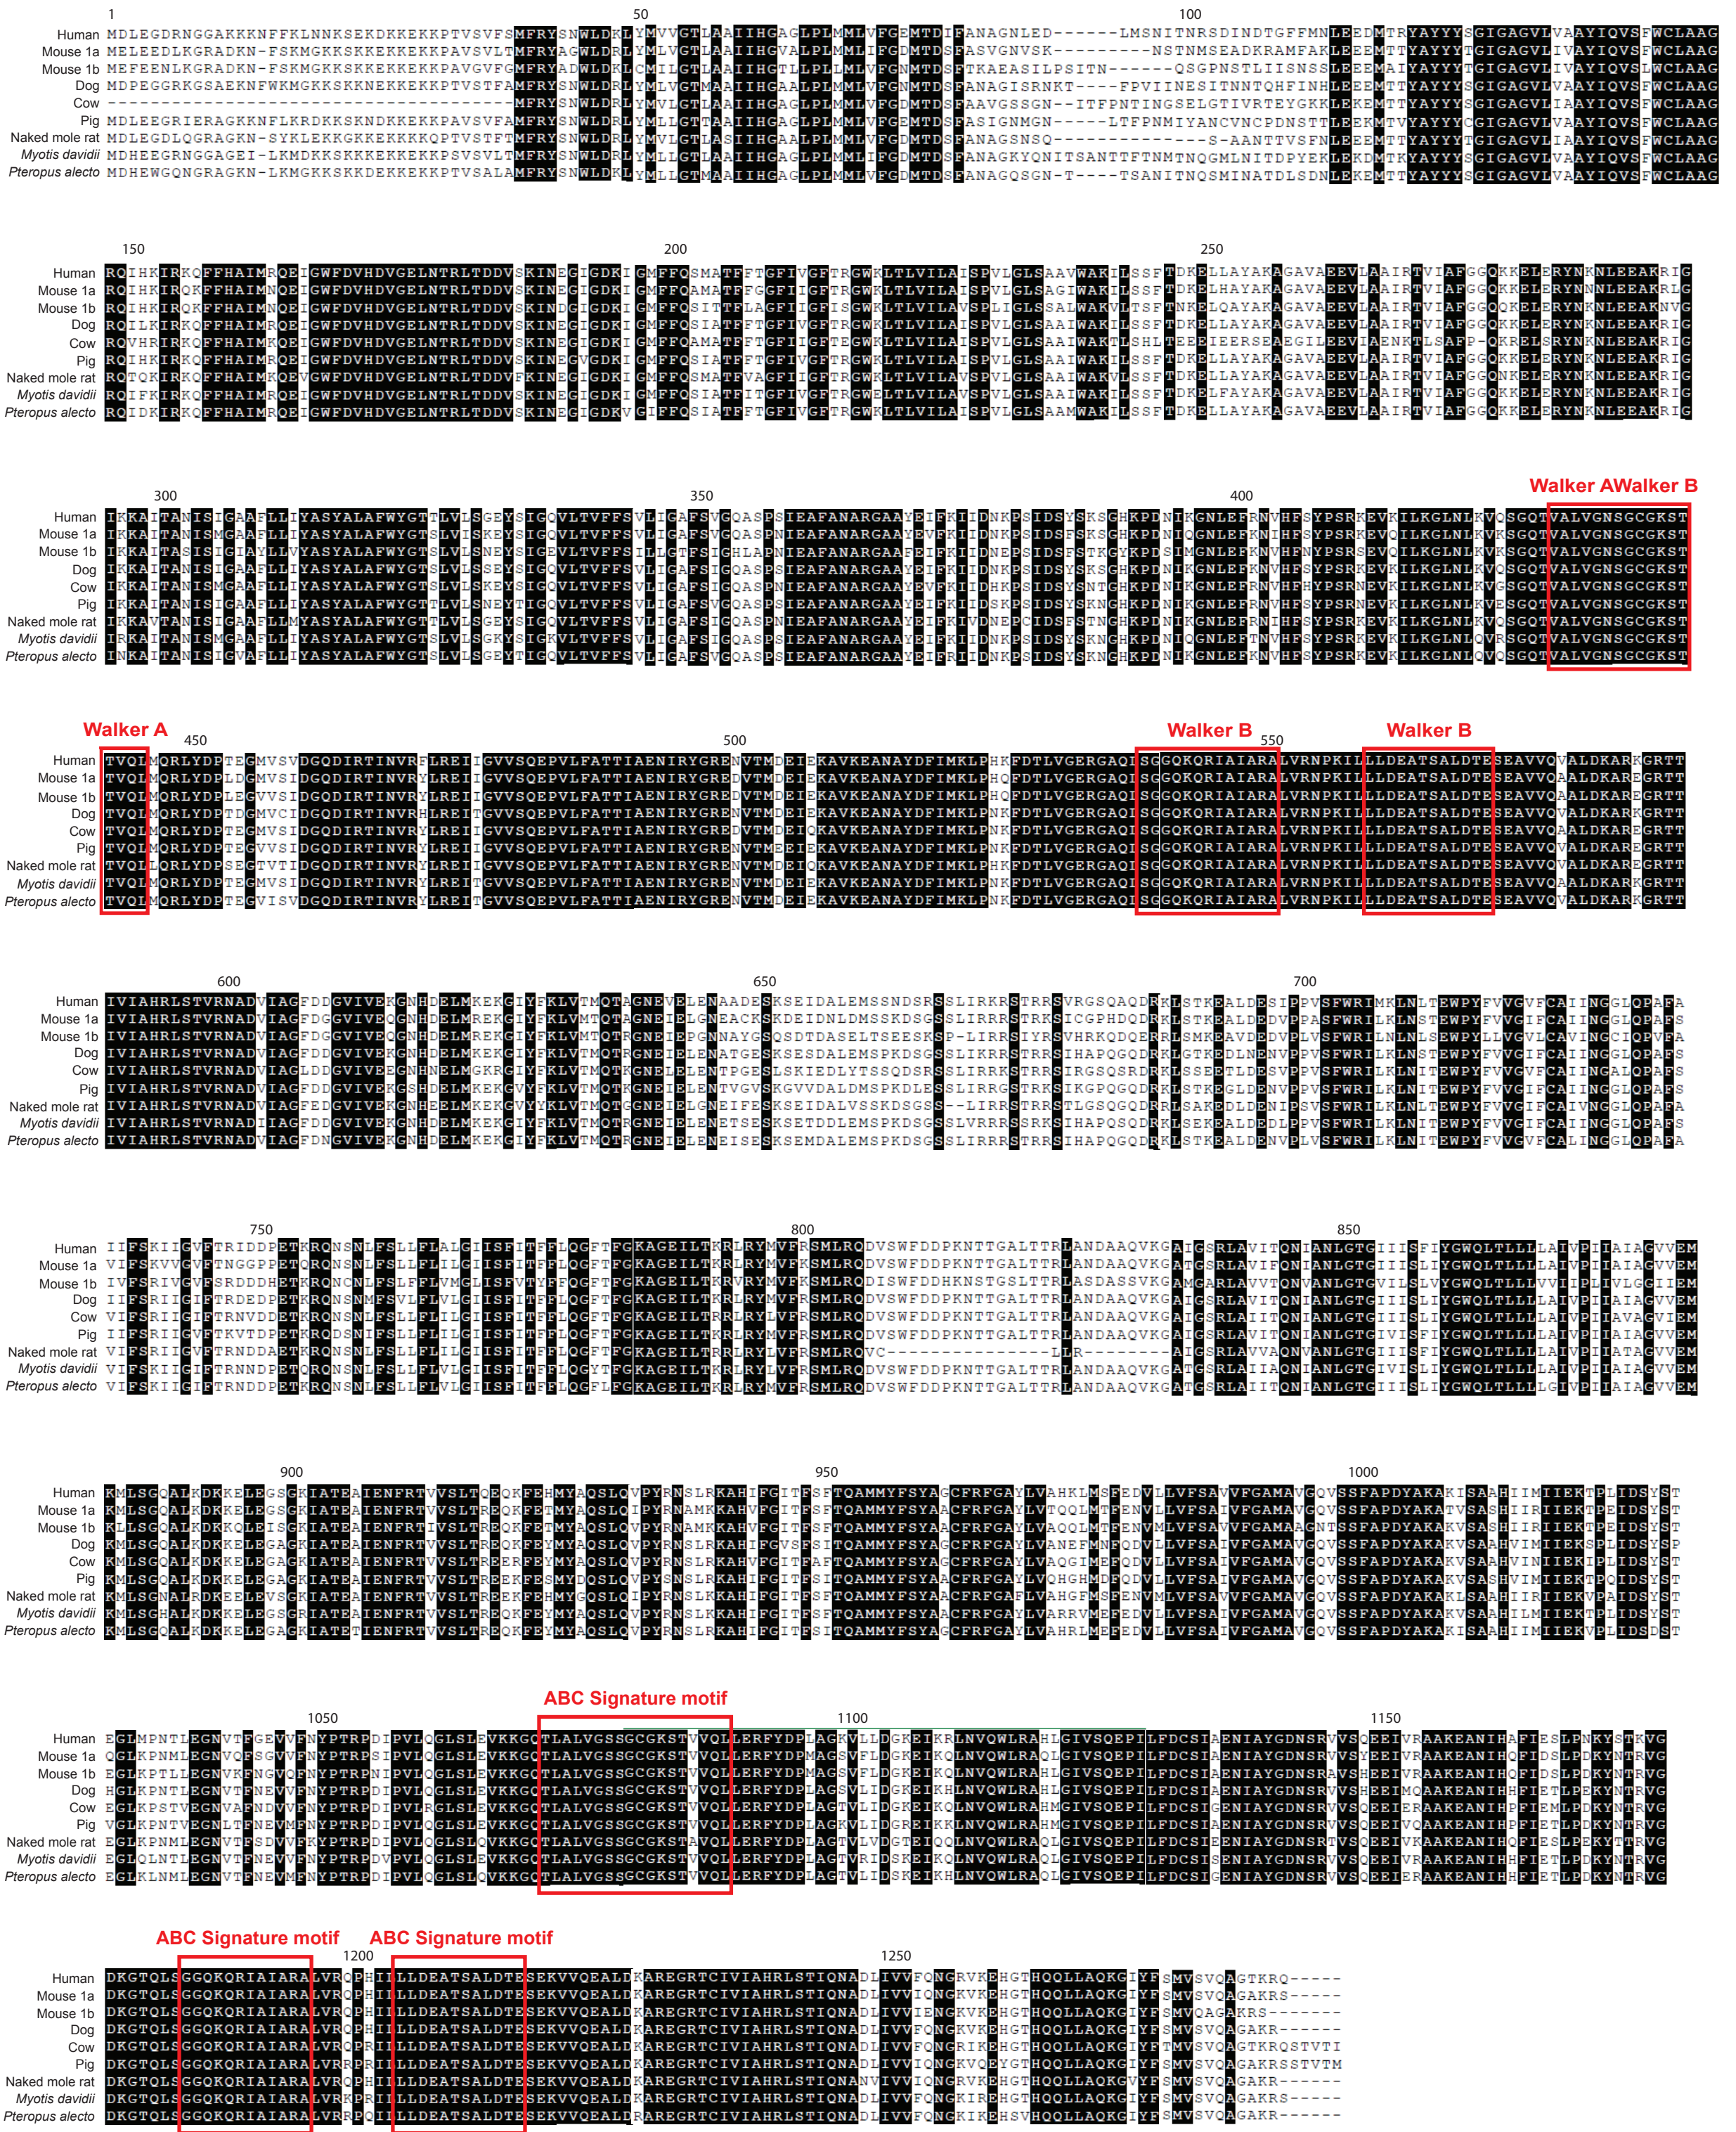

Supplementary Figure 4. A sequence alignment of ABCB1 protein

Amino acid sequences of ABCB1 from the indicated mammals are shown. nmr indicates naked mole rat. Amino acid residues conserved across species are highlighted in black. Walker A-, Walker B-, and ABC signature-motifs are marked with red rectangle.



**Supplementary Table 1.** Homology of ABCB1 protein sequence between human and other species

| <b>Mammalian species</b>                     | <b>Percentage conserved to Human ABCB1 protein (%)</b> |
|----------------------------------------------|--------------------------------------------------------|
| Bat, <i>Pteropus alecto</i>                  | 89.5                                                   |
| Bat, <i>Myotis davidii</i>                   | 88.4                                                   |
| Rhesus monkey, <i>Macaca mulatta</i>         | 96.2                                                   |
| Mouse Abcb1a, <i>Mus musculus</i>            | 87.2                                                   |
| Mouse Abcb1b, <i>Mus musculus</i>            | 79.5                                                   |
| Dog, <i>Canis lupus familiaris</i>           | 90.0                                                   |
| Cow, <i>Bos taurus</i>                       | 83.8                                                   |
| Pig, <i>Sus scrofa</i>                       | 88.8                                                   |
| Cat, <i>Felis catus</i>                      | 90.8                                                   |
| Naked mole rat, <i>Heterocephalus glaber</i> | 84.8                                                   |

**Supplementary Table 2.** Summary of individual or average maximum lifespan and body mass of bat species used in this study. All data are summarised from AnAge dataset, <http://genomics.senescence.info/species/>

| <b>Bat species</b>                   | <b>Maximum lifespan (years)</b> | <b>Body mass (g)</b> |
|--------------------------------------|---------------------------------|----------------------|
| <i>Pteropus alecto</i>               | 19.7                            | 672.1                |
| <i>Cynopterus brachyotis</i>         | 10.1                            | 45                   |
| <i>Myotis</i> species (Average)      | 22.13                           | 10.4                 |
| <i>Rhinolophus</i> species (Average) | 24.3                            | 11.9                 |

**Supplementary Table 3.** Summary of cell lines established and used in this study

| <b>Species</b> | <b>Cell lines</b>                 | <b>Description</b>                                                                                |
|----------------|-----------------------------------|---------------------------------------------------------------------------------------------------|
| Human          | WI-38                             | Human fetal lung-derived fibroblast                                                               |
|                | IMR-90                            | Human fetal lung-derived fibroblast                                                               |
|                | AG01518                           | Normal human foreskin-derived fibroblast                                                          |
|                | HEK293T                           | Human embryonic kidney epithelial cells, SV40 immortalized                                        |
|                | HepG2                             | Human hepatocellular carcinoma                                                                    |
|                | MDA-MB-231                        | Human adenocarcinoma                                                                              |
|                | HT-29                             | Human colorectal adenocarcinoma                                                                   |
|                | WiDr                              | Human colorectal adenocarcinoma                                                                   |
|                | U251MG                            | Human glioblastoma astrocytoma                                                                    |
|                | K562                              | Chronic myelogenous leukemia                                                                      |
|                | KCL22                             | Chronic myeloid leukemia in blast crisis                                                          |
| Mouse          | NIH3T3                            | Mouse embryonic fibroblast, self-immortalized                                                     |
|                | MEF                               | Mouse embryonic fibroblast, self-immortalized                                                     |
| Bats           | PaLung                            | <i>Pteropus alecto</i> lung-derived fibroblast                                                    |
|                | PaKidney                          | <i>Pteropus alecto</i> kidney-derived fibroblast                                                  |
|                | PaBrain                           | <i>Pteropus alecto</i> brain-derived fibroblast, hTert immortalized                               |
|                | PaSpleen                          | <i>Pteropus alecto</i> spleen-derived fibroblast, SV40 immortalized                               |
|                | PaMarrow                          | <i>Pteropus alecto</i> bone marrow-derived cells, self-immortalized                               |
|                | PaKiT03                           | <i>Pteropus alecto</i> kidney-derived fibroblast, SV40 immortalized                               |
|                | <i>C. brachyotis</i> Lung         | <i>Cynoterus brachyotis</i> primary lung-derived fibroblast, <i>Pteropodidae</i> family           |
|                | <i>M. davidii</i> Kidney          | <i>Myotis davidii</i> kidney-derived cell line, self-immortalized, <i>Vespertilionidae</i> family |
|                | <i>M. muricola</i> Lung           | <i>Myotis muricola</i> Lung-derived cell line, self-immortalized, <i>Vespertilionidae</i> family  |
|                | <i>R. lepidus</i> Large Intestine | <i>Rhinolopus lepidus</i> primary large intestine-derived fibroblast, <i>Rhinolophidae</i> family |



**Figure 1A**

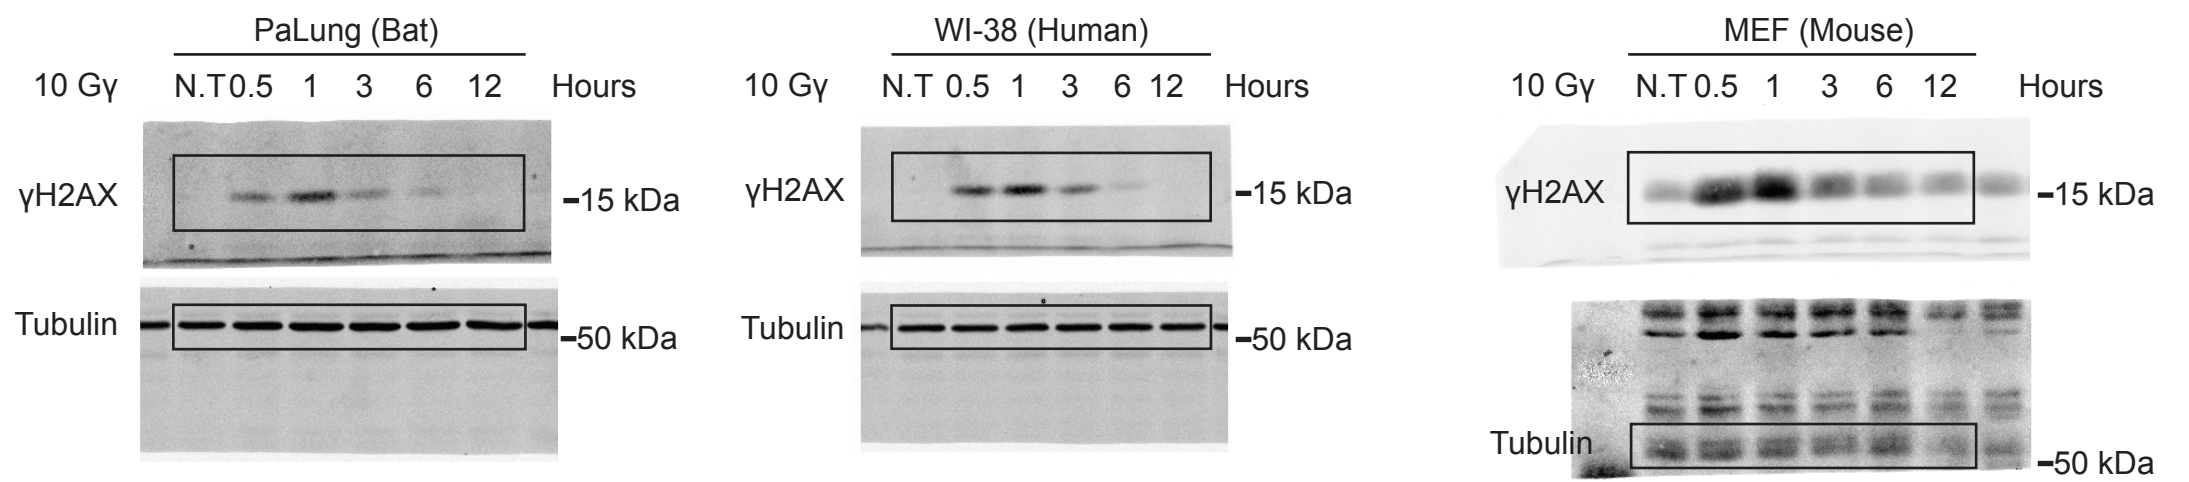

**Figure 1C**

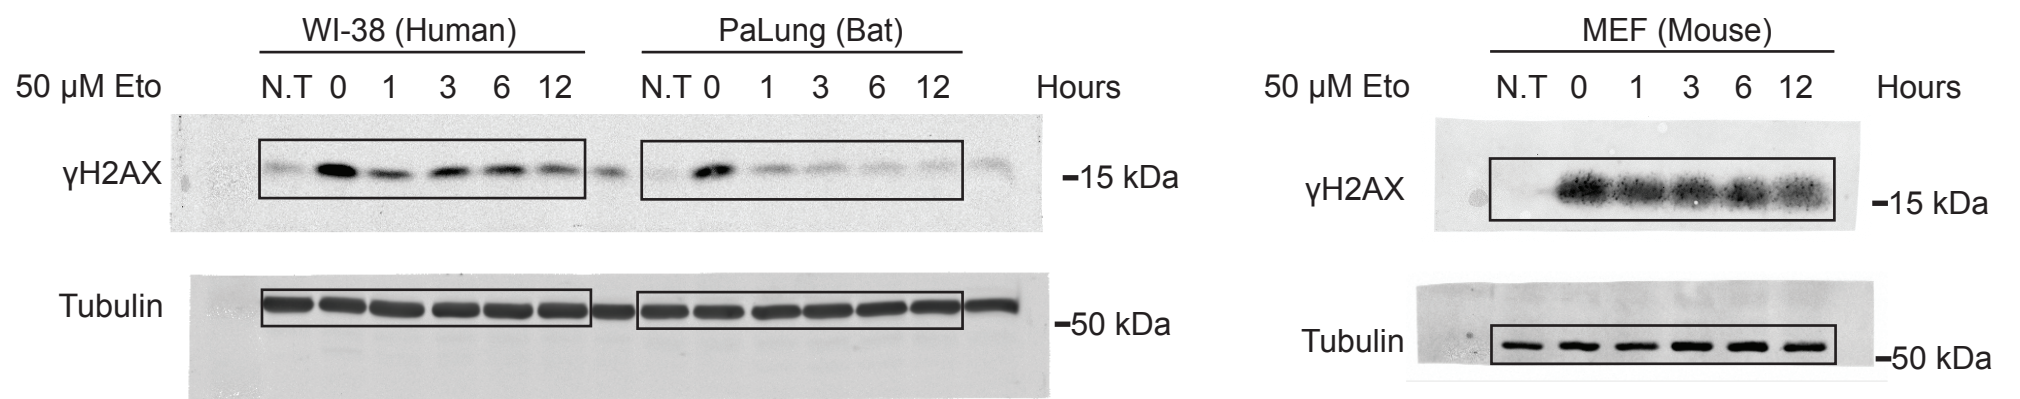

**Supplementary Figure 5. Uncropped Western blots for Figure 1A and 1C**

**Figure 2A**

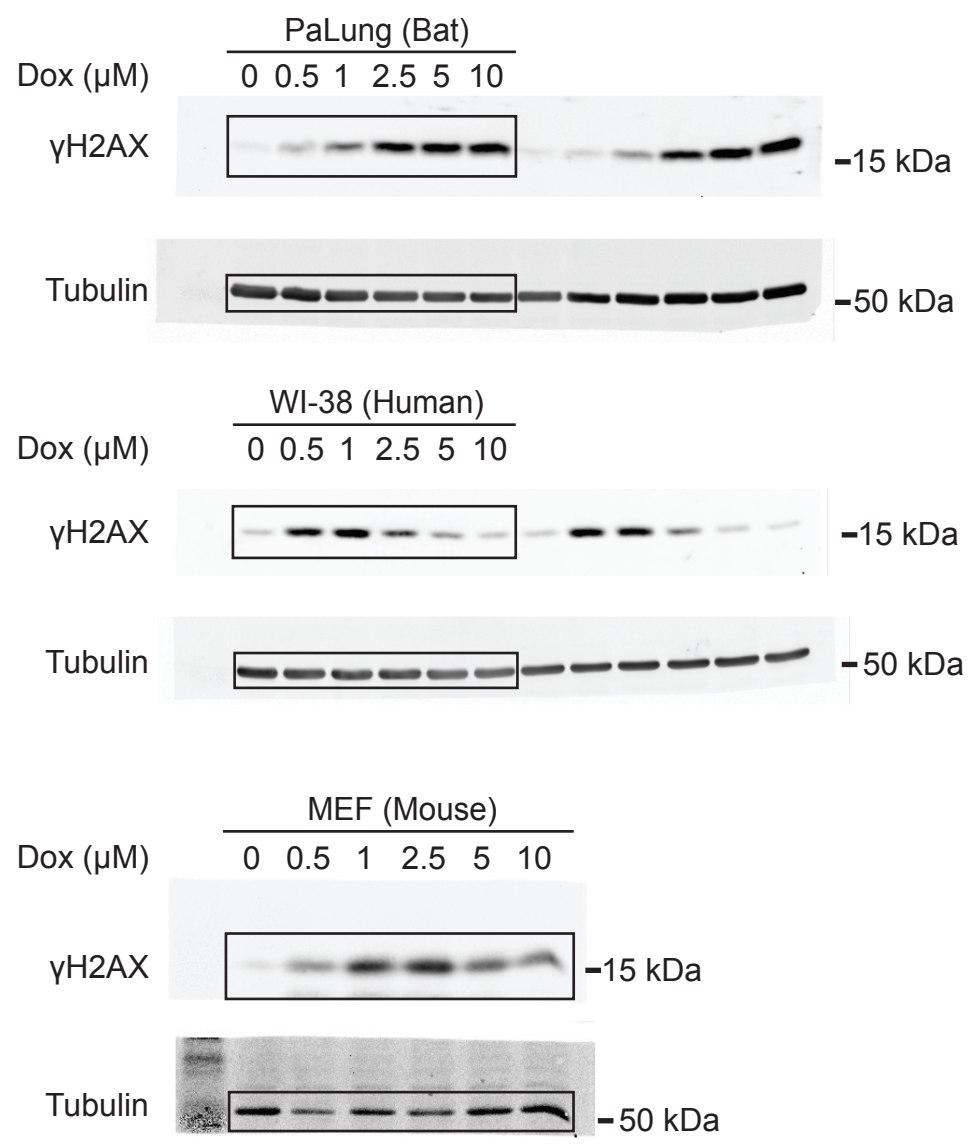

**Figure 2B**

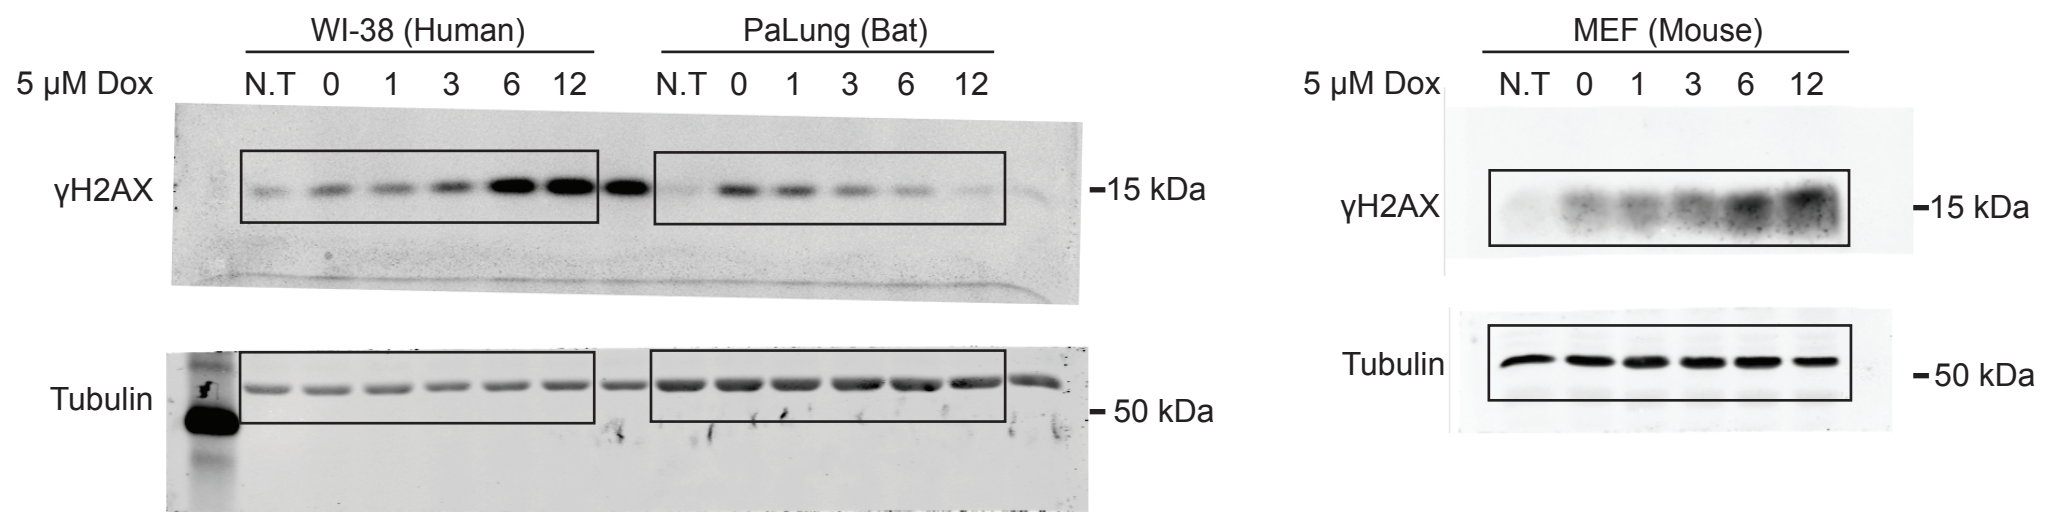

**Supplementary Figure 6. Uncropped Western blots for Figure 2A and 2B.**

**Figure 4A**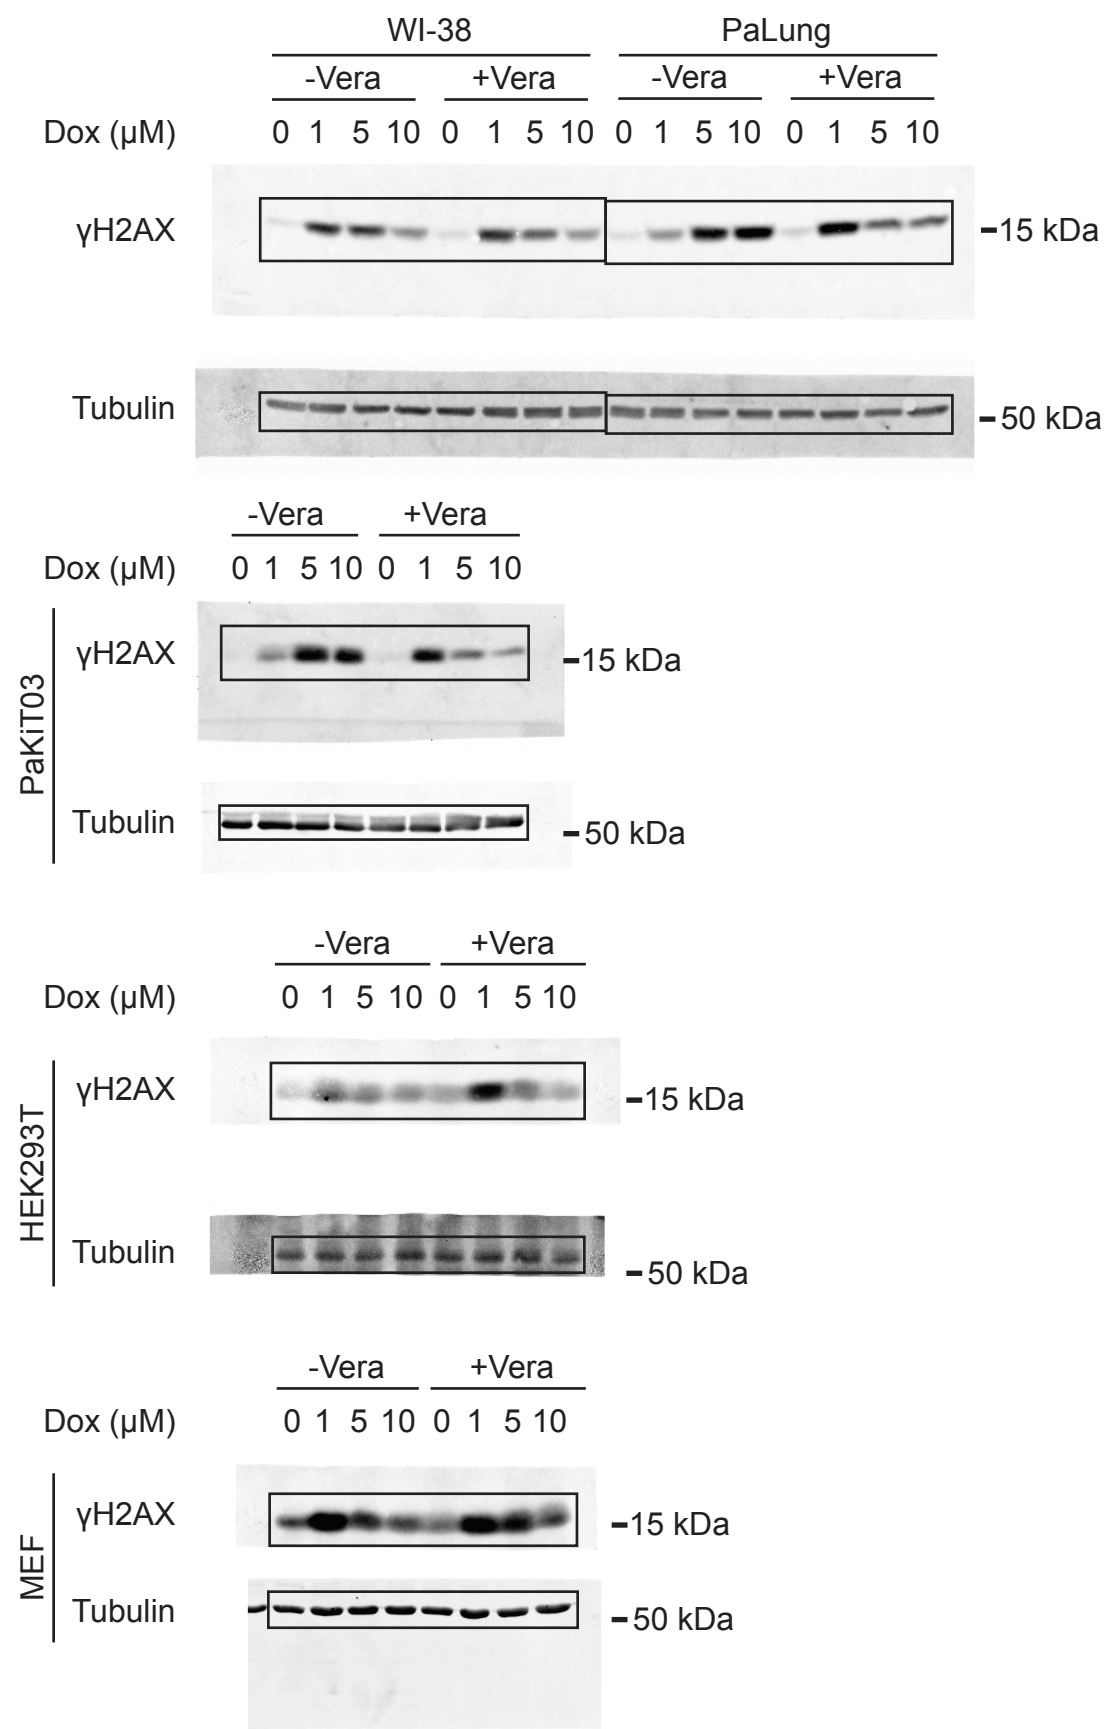**Figure 4B**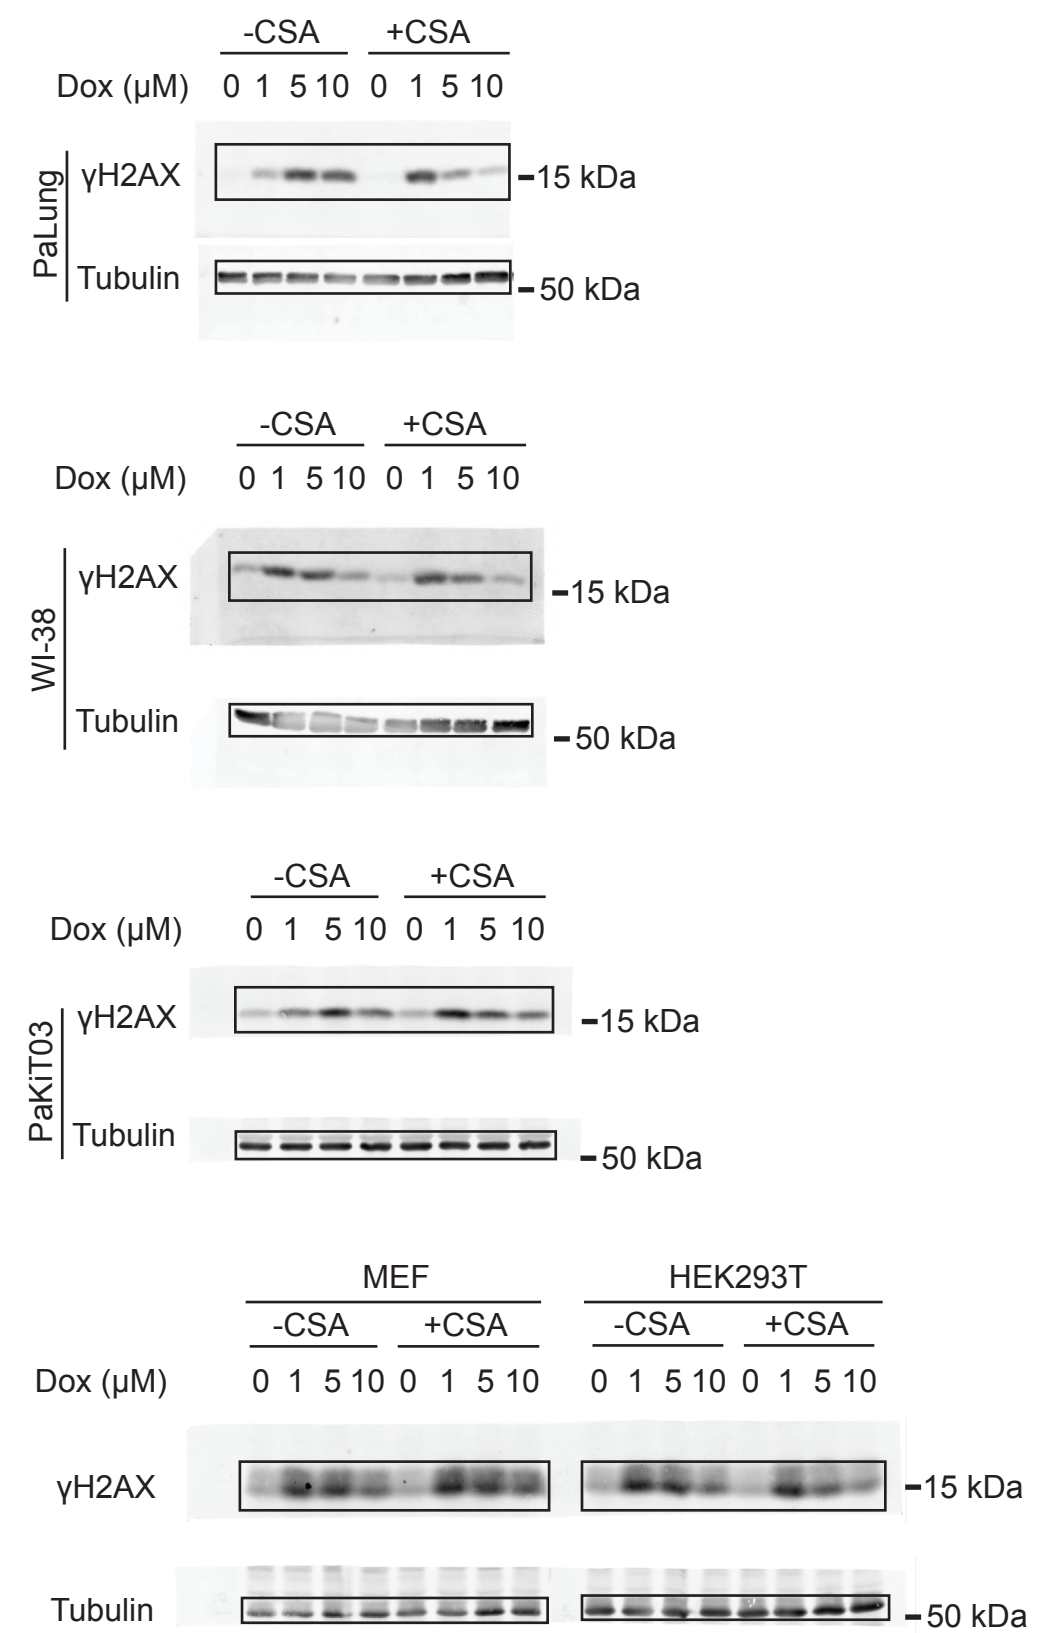**Figure 4C**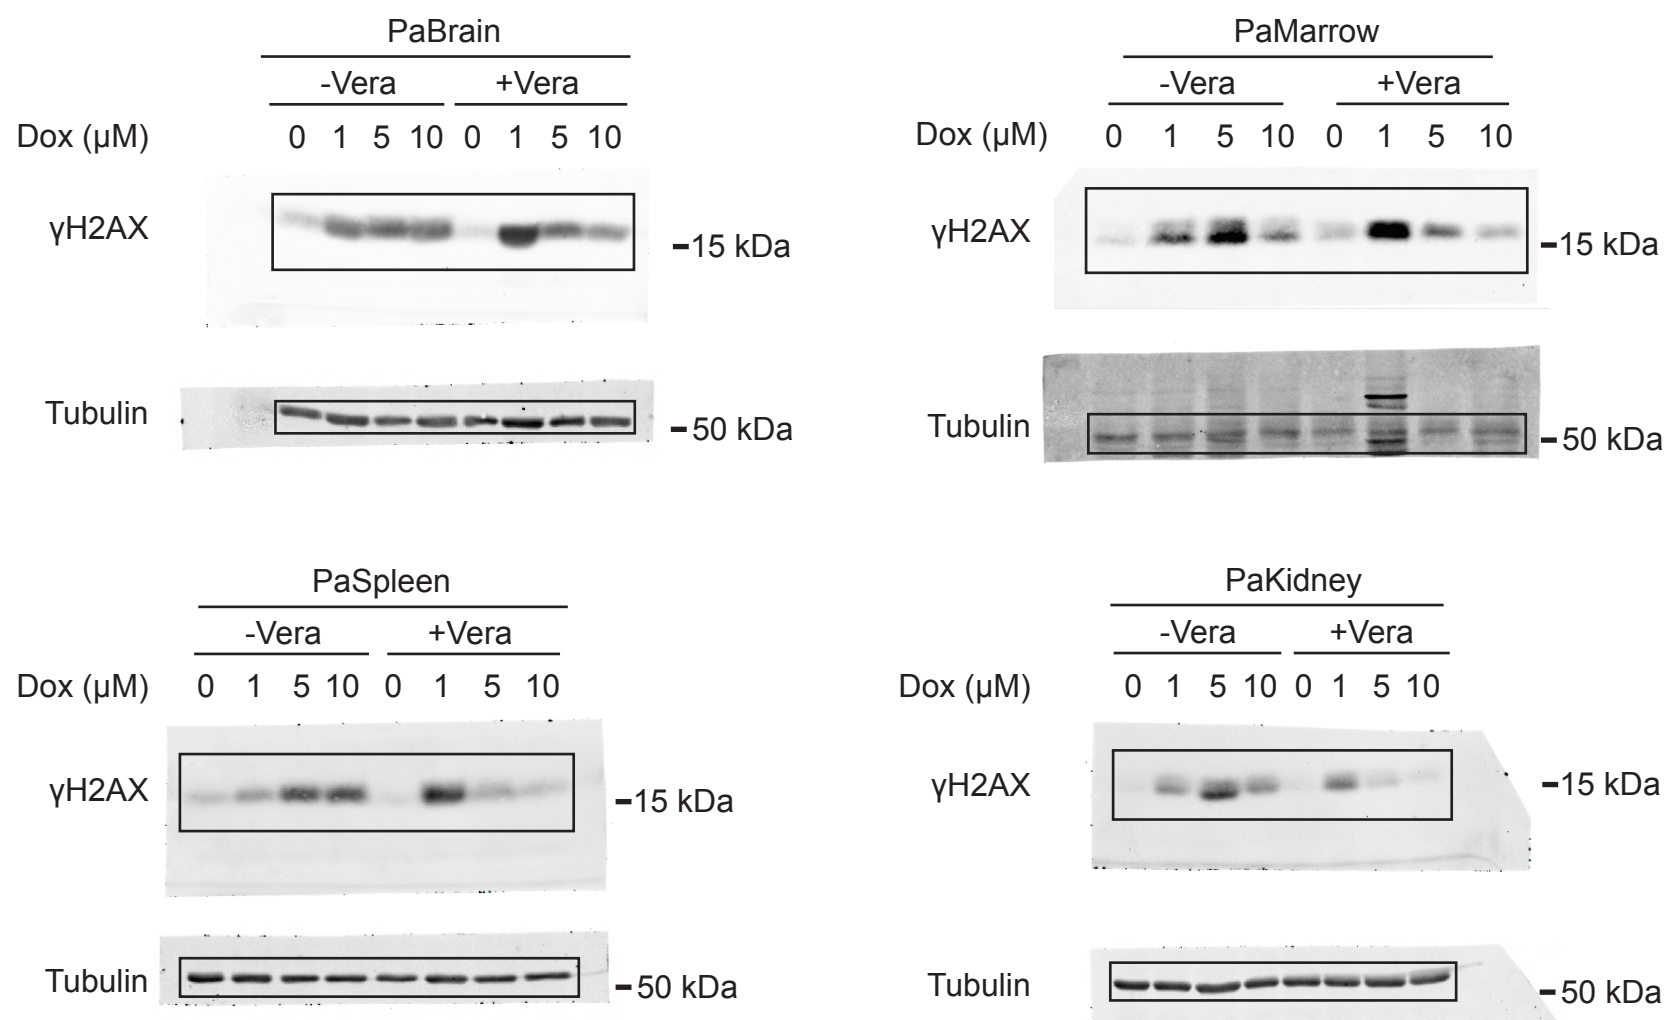**Supplementary Figure 7. Uncropped Western blots for Figure 4.**



**Figure 5D**

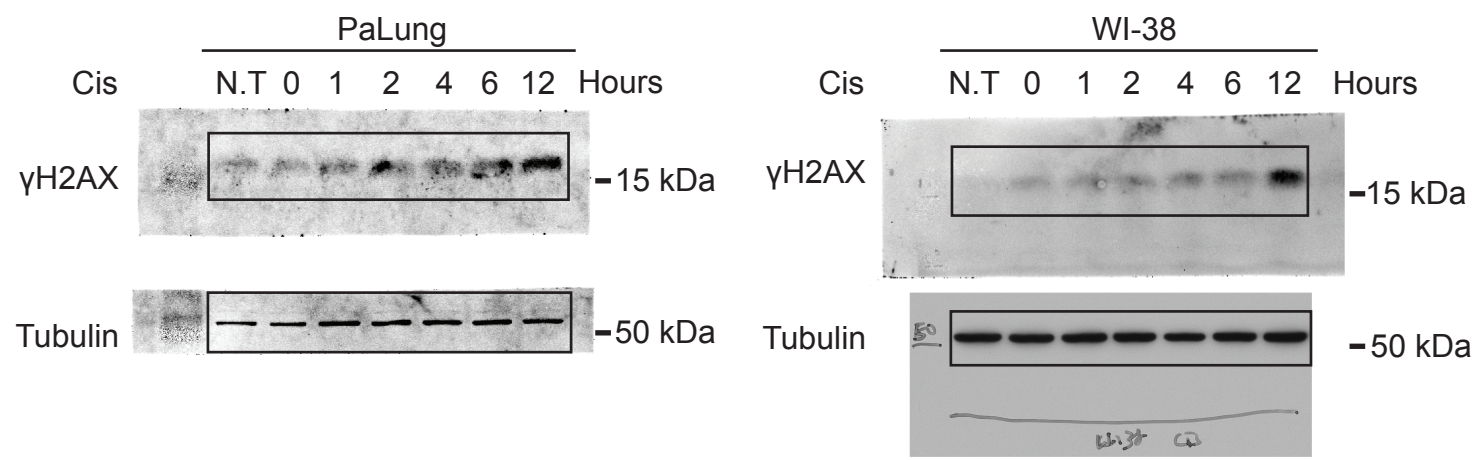

**Supplementary Figure 8. Uncropped Western blots for Figure 5D.**

**Figure 6A**

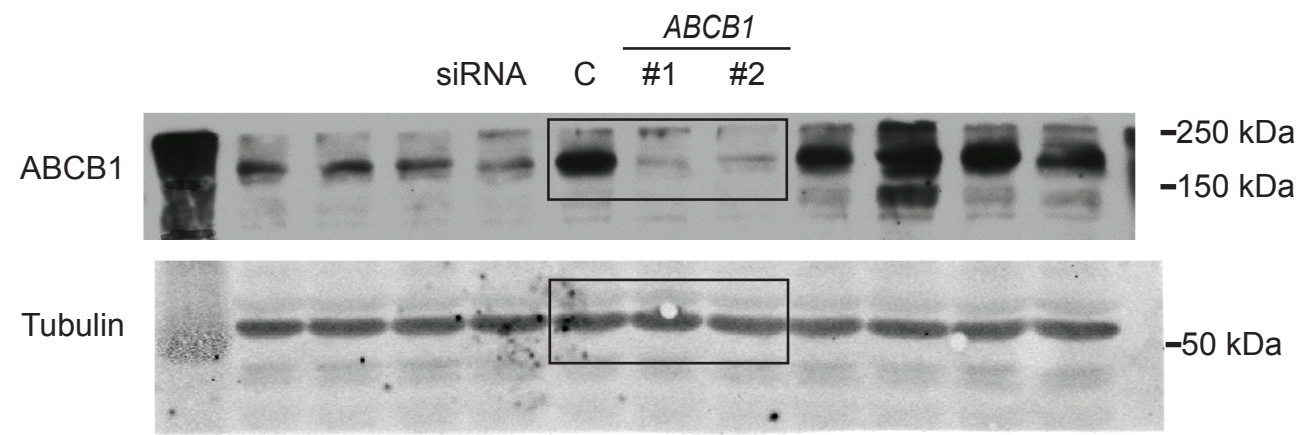

**Supplementary Figure 9. Uncropped Western blots for Figure 6A.**

**Figure 7B**

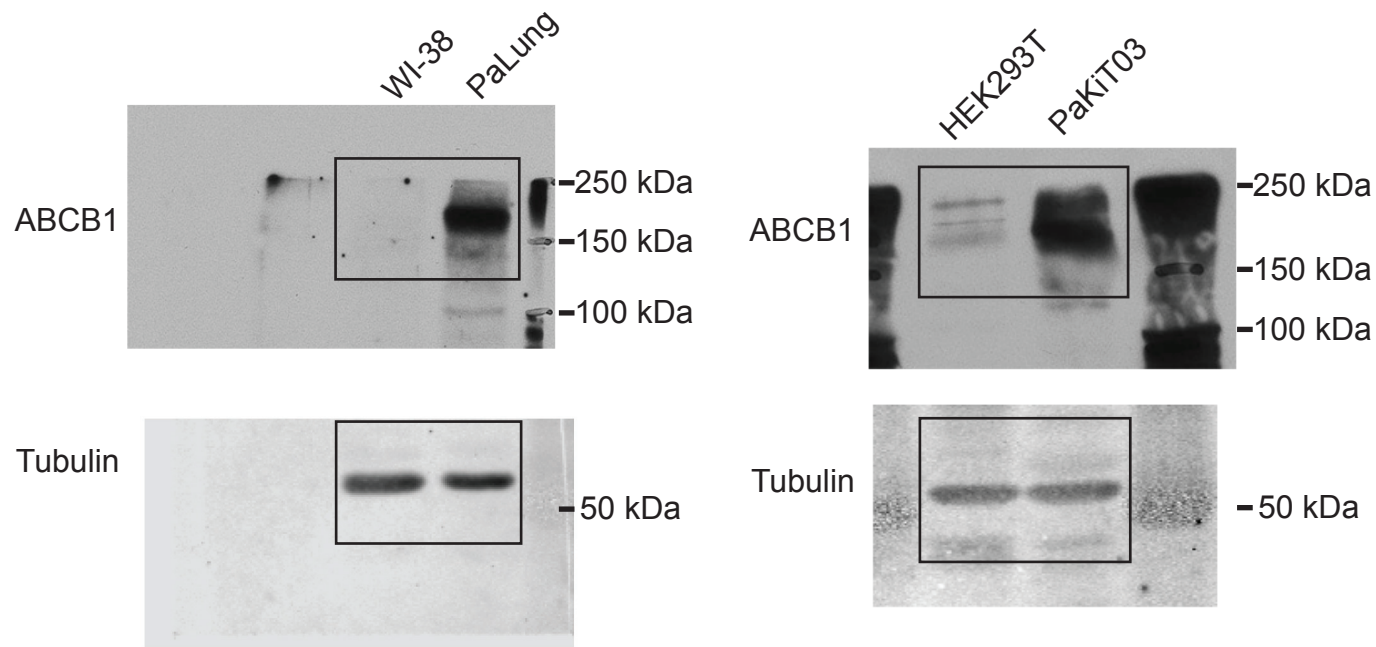

**Figure 7D**

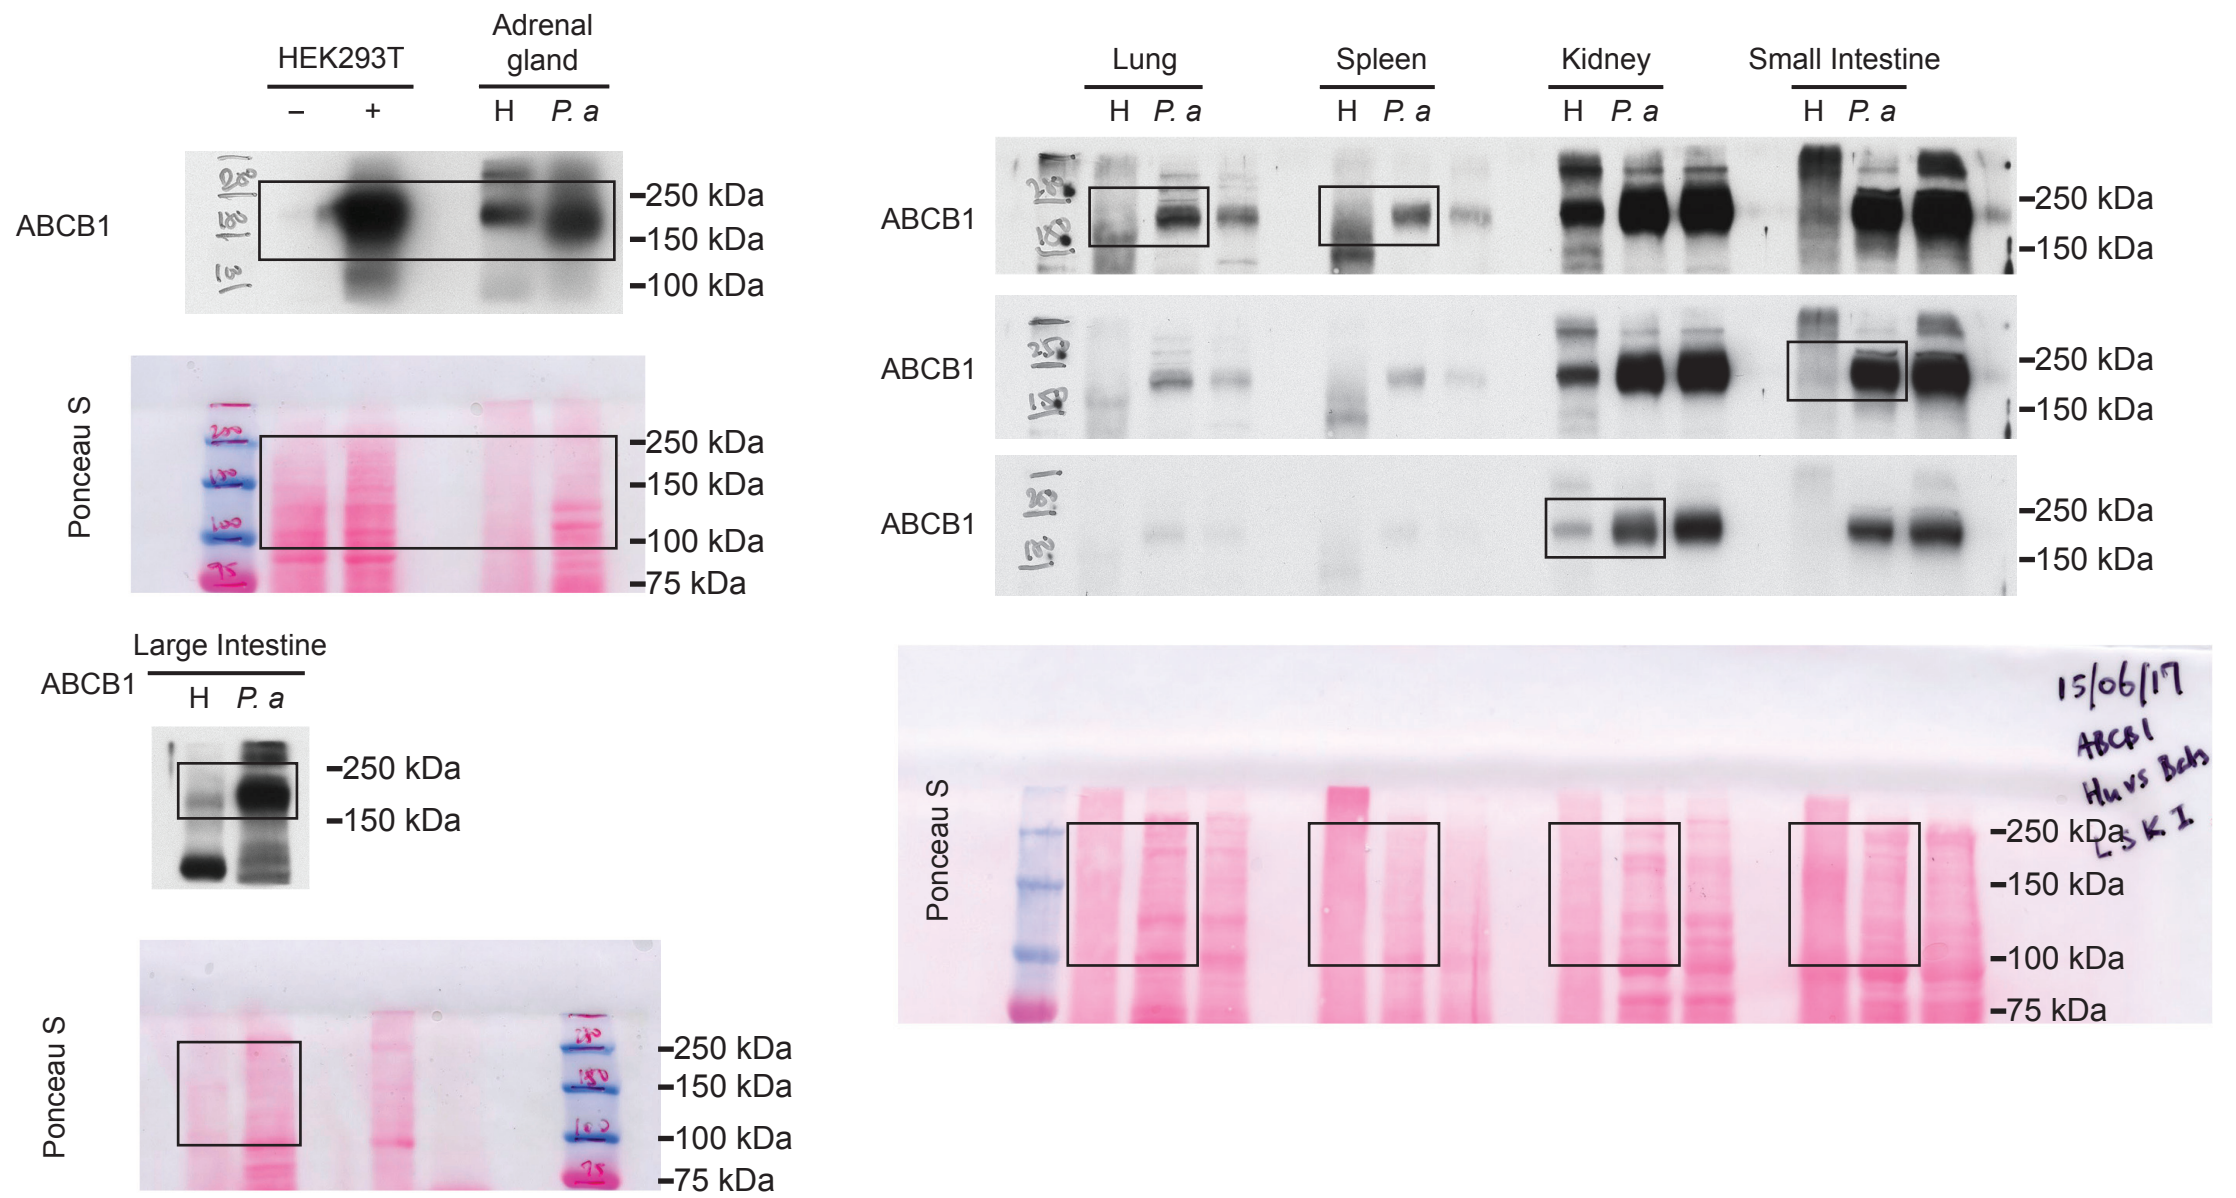

**Supplementary Figure 10. Uncropped Western blots for Figure 7B and 7D.**



**Figure 7E**

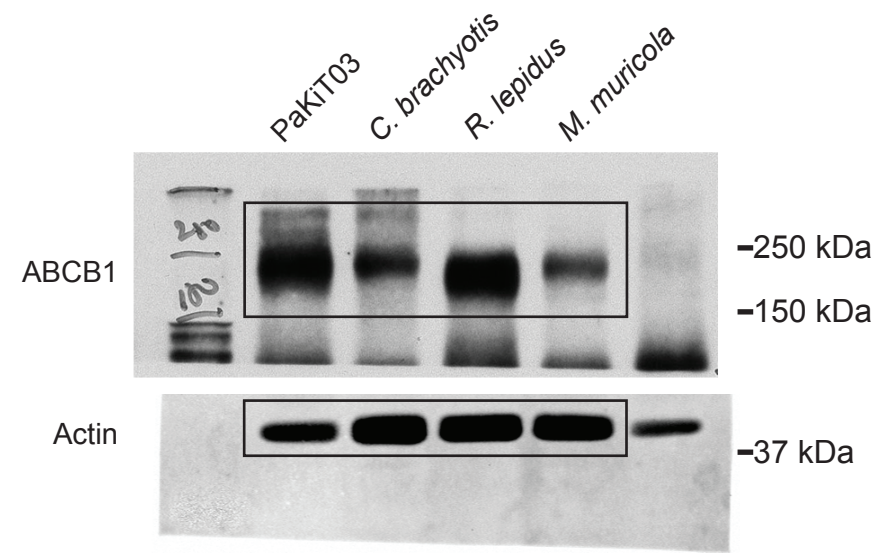

**Figure 7G**

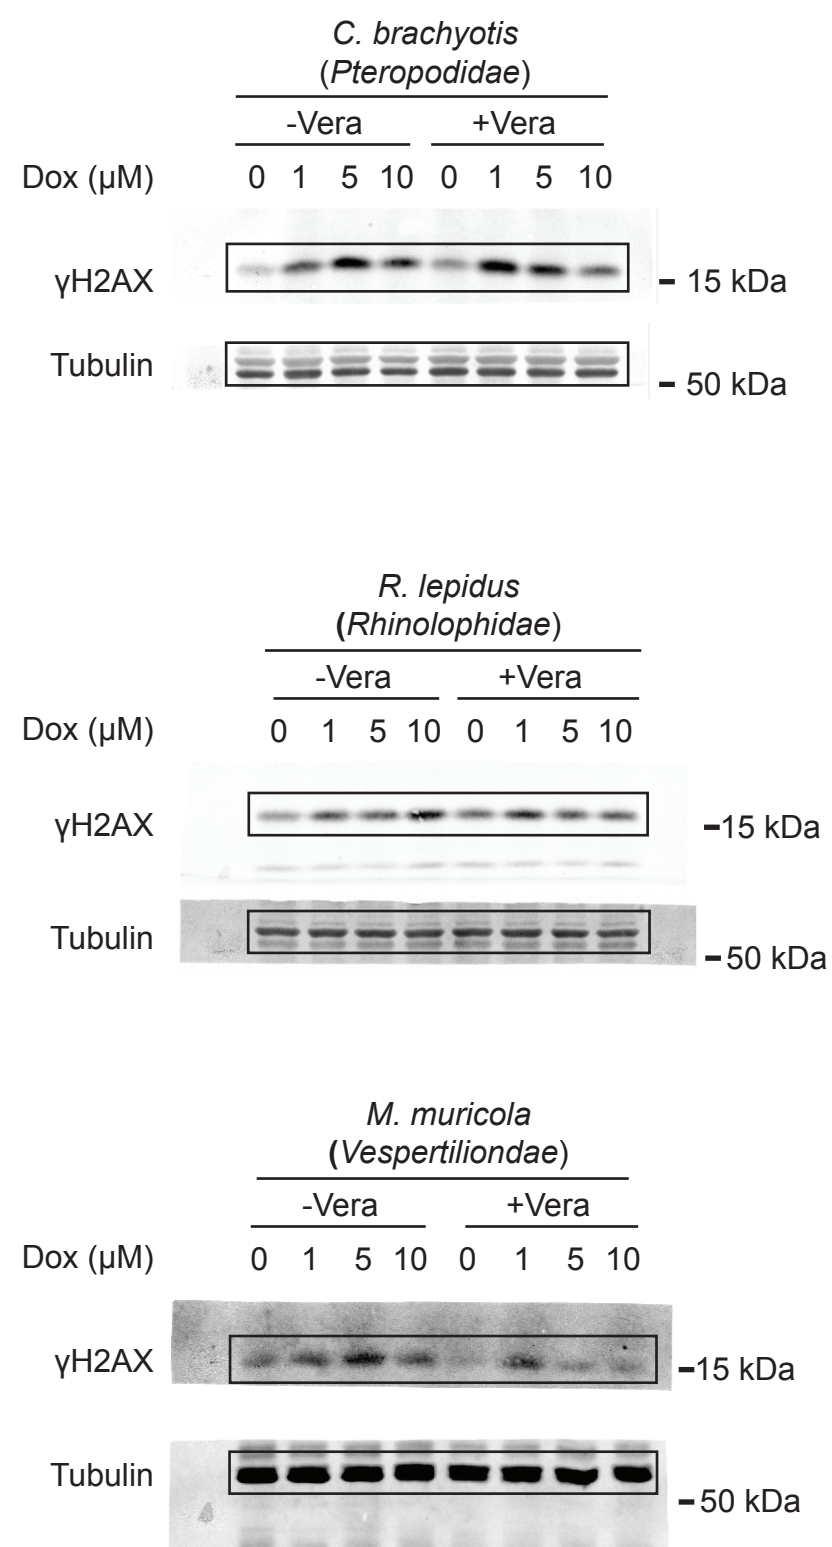

**Supplementary Figure 11. Uncropped Western blots for Figure 7E and 7G.**

### Supplementary Figure 1A

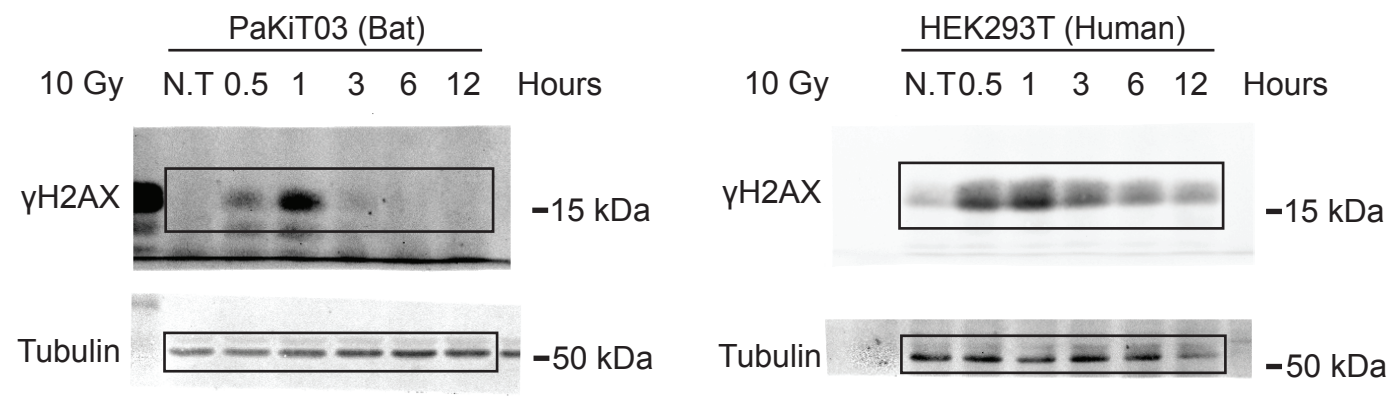

### Supplementary Figure 1C

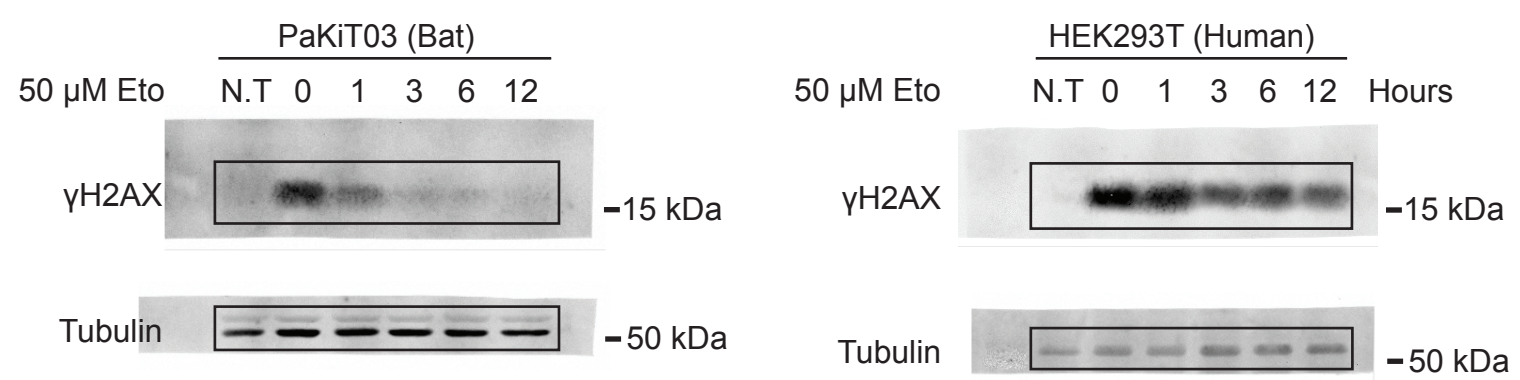

Supplementary Figure 12. Uncropped Western blots for Supplementary Figure 1A and 1C

## Supplementary Figure 2A

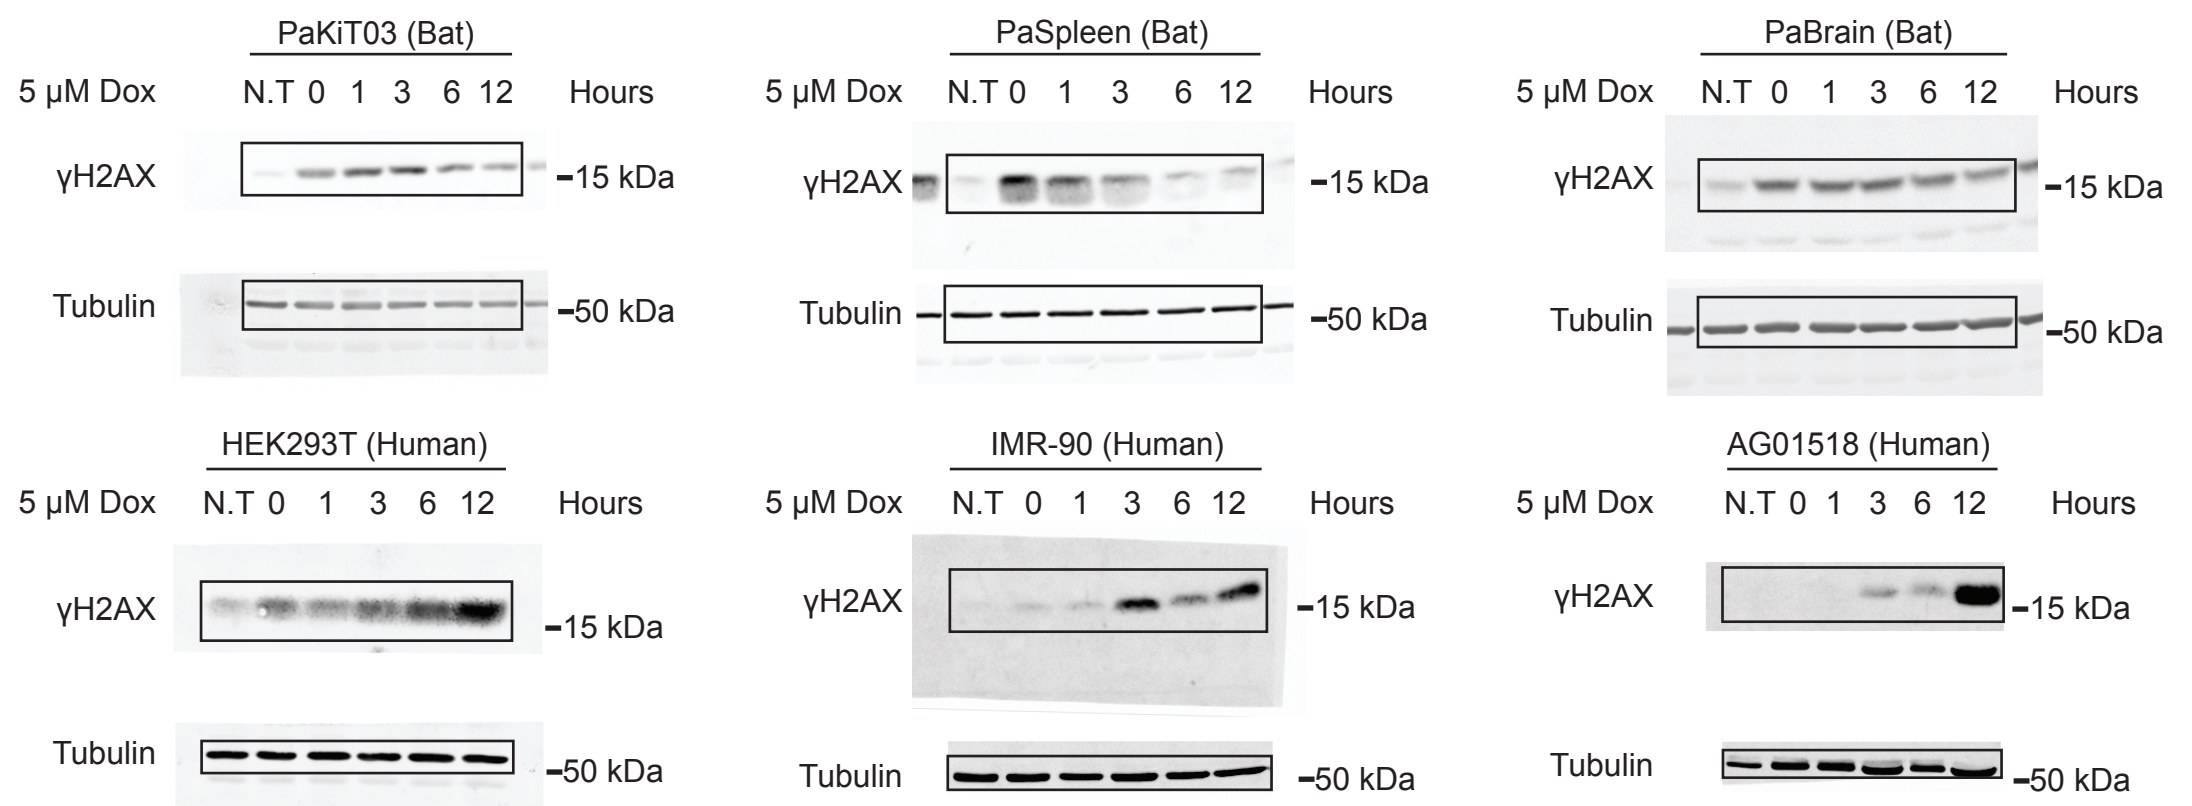

Supplementary Figure 13. Uncropped Western blots for Supplementary Figure 2A
